# Supplementary material for: Upper and Lower Limb Movement Kinematics in Aging FMR1 Gene Premutation Carriers
Source: PubMed Central journal article supplement (PMC7823457; doi:10.3390/brainsci11010013), 2020-12-24
Supplement: brainsci-11-00013-s001.pdf [file brainsci-11-00013-s001.pdf]

**Table S1.** Descriptive statistics [mean (SD)] and between group comparisons of all gait variables during non-constrained walking trials. Dependent variables (bold-faced) that showed significant group main effect at the alpha level of .02 are depicted in Figure 2 of the article. Stride time CoV was significant at the alpha level of 0.05.

| Gait Variables                               | Control<br>(n=18)   | FXTAS-<br>(n=6)    | FXTAS+<br>(n=9)     | F                    | p            |
|----------------------------------------------|---------------------|--------------------|---------------------|----------------------|--------------|
| <u>Spatial domain</u>                        |                     |                    |                     |                      |              |
| Stride length (mm)                           | 1176.96<br>(87.48)  | 1167.54<br>(79.21) | 1050.48<br>(95.24)  | 5.825 <sup>#</sup>   | 0.008**      |
| Stride length CoV (mm)                       | 0.0482<br>(0.0284)  | 0.0488<br>(0.0252) | 0.0561<br>(0.0277)  | 0.234                | 0.793        |
| Step width (mm)                              | 73.32<br>(30.76)    | 68.89<br>(24.16)   | 78.28<br>(35.06)    | 0.162                | 0.851        |
| Step width CoV (mm)                          | 0.6254<br>(0.7163)  | 0.3795<br>(0.1366) | 0.6187<br>(0.4119)  | 0.429                | 0.656        |
| <u>Temporal domain</u>                       |                     |                    |                     |                      |              |
| Stride velocity (mm/s)                       | 1334.96<br>(173.32) | 1295.08<br>(88.67) | 1094.55<br>(181.14) | 5.929 <sup>#</sup>   | 0.007**      |
| Stride velocity CoV (mm/s)                   | 0.0555<br>(0.0339)  | 0.0561<br>(0.0286) | 0.0638<br>(0.0253)  | 0.204                | 0.817        |
| Pct. double support time (%) <sup>ϕ</sup>    | 10.65<br>(1.13)     | 10.55<br>(1.46)    | 13.00<br>(2.85)     | 4.800 <sup>#</sup>   | 0.016*       |
| Pct. Double support time CoV (%)             | 0.1425<br>(0.0731)  | 0.1425<br>(0.0808) | 0.1509<br>(0.0593)  | 0.041                | 0.960        |
| Stride time (s)                              | 0.8912<br>(0.0860)  | 0.9040<br>(0.0590) | 0.9759<br>(0.1263)  | 2.214                | 0.129        |
| Stride time CoV (s)                          | 0.0322<br>(0.0141)  | 0.0288<br>(0.0150) | 0.0486<br>(0.0202)  | <b>3.530</b>         | <b>0.043</b> |
| Cadence (steps/min)                          | 135.68<br>(12.98)   | 133.21<br>(8.49)   | 125.14<br>(15.16)   | 1.794                | 0.186        |
| Cadence CoV (steps/min) <sup>ϕ</sup>         | 0.0452<br>(0.0124)  | 0.0373<br>(0.0148) | 0.0720<br>(0.0292)  | 5.926 <sup>#,+</sup> | 0.007**      |
| <u>Kinematic domain</u>                      |                     |                    |                     |                      |              |
| COM standard deviation (mm)                  | 8.94<br>(2.26)      | 6.91<br>(2.01)     | 11.09<br>(3.04)     | 5.096 <sup>+</sup>   | 0.013*       |
| Heel strike ipsilateral knee angle (deg)     | 3.56<br>(5.72)      | 4.50<br>(7.06)     | 2.38<br>(5.51)      | 0.225                | 0.800        |
| Heel strike ipsilateral knee angle CoV (deg) | 0.5778<br>(3.1355)  | 0.3743<br>(0.3559) | 4.43<br>(11.62)     | 1.111                | 0.344        |
| Heel strike contralateral knee angle (deg)   | 7.11                | 8.81               | 4.39                | 0.983                | 0.387        |

|                                                 |                    |                    |                   |       |       |
|-------------------------------------------------|--------------------|--------------------|-------------------|-------|-------|
|                                                 | (7.05)             | (3.53)             | (5.15)            |       |       |
| Heel strike contralateral knee angle CoV (deg)  | 1.56<br>(2.88)     | 0.3114<br>(0.1586) | 0.7957<br>(2.08)  | 0.678 | 0.516 |
| Heel strike ipsilateral ankle angle (deg)       | -1.83<br>(16.82)   | 0.5732<br>(10.91)  | -7.64<br>(25.32)  | 0.392 | 0.680 |
| Heel strike ipsilateral ankle angle CoV (deg)   | 0.9405<br>(7.42)   | 0.4239<br>(.8909)  | -1.60<br>(5.41)   | 0.456 | 0.638 |
| Heel strike contralateral ankle angle (deg)     | 11.06<br>(28.25)   | 13.73<br>(7.65)    | 19.95<br>(3.22)   | 0.462 | 0.635 |
| Heel strike contralateral ankle angle CoV (deg) | 0.1202<br>(0.6449) | 66.09<br>(1623.80) | 1.12<br>(2.28)    | 2.185 | 0.135 |
| Toe off ipsilateral knee angle (deg)            | 29.84<br>(10.28)   | 32.05<br>(7.34)    | 25.95<br>(11.03)  | 0.697 | 0.507 |
| Toe off ipsilateral knee angle CoV (deg)        | 0.3133<br>(0.3223) | 0.1388<br>(0.0590) | 0.3106<br>(.2972) | 0.890 | 0.422 |
| Toe off contralateral knee angle (deg)          | 11.10<br>(5.14)    | 10.86<br>(6.99)    | 6.10<br>(7.01)    | 1.965 | 0.160 |
| Toe off contralateral knee angle CoV (deg)      | 0.5919<br>(0.5591) | 0.4300<br>(0.2469) | -0.0028<br>(2.51) | 0.519 | 0.601 |
| Toe off ipsilateral ankle angle (deg)           | -10.30<br>(15.16)  | -9.03<br>(13.48)   | -9.01<br>(11.29)  | 0.031 | 0.969 |
| Toe off ipsilateral ankle angle CoV (deg)       | -0.1987<br>(22.82) | -2.65<br>(2.94)    | -1.43<br>(2.10)   | 1.953 | 0.161 |
| Toe off contralateral ankle angle (deg)         | -1.84<br>(19.05)   | 0.7962<br>(8.00)   | -0.7495<br>(6.57) | 0.069 | 0.933 |
| Toe off contralateral ankle angle CoV(deg)      | -.2727<br>(8.86)   | 0.8777<br>(1.62)   | -0.3312<br>(4.00) | 0.068 | 0.934 |

CoV=coefficient of variation; <sup>§</sup> Log<sub>10</sub> transformed variables; <sup>#</sup> FXTAS+ group differ from healthy controls; <sup>†</sup> FXTAS+ group differ from FXTAS- group; <sup>\*</sup> *p*<.02, <sup>\*\*</sup> *p*<.01.

**Table S2.** Descriptive statistics [mean (SD)]and between group comparisons of all reaching variables during reaching-in-standing trials. In general, no reaching variable has shown a significant group main effect based on adjusted alpha at 0.025 (See method). Reaching duration and shoulder acceleration time of the small box condition were significant at the alpha level of 0.05.

|                                   | <b>Control<br/>(n=16)</b> | <b>FXTAS-<br/>(n=6)</b> | <b>FXTAS+<br/>(n=9)</b> | <b>F</b>     | <b>p</b>      |
|-----------------------------------|---------------------------|-------------------------|-------------------------|--------------|---------------|
| <b><u>Small box condition</u></b> |                           |                         |                         |              |               |
| Reaching duration (s)             | 1.14 (0.19)               | 1.39 (0.26)             | 1.28 (0.17)             | <b>3.910</b> | <b>0.032*</b> |
| Hand max velocity (cm/s)          | 101.76 (21.91)            | 95.76 (22.48)           | 90.13 (14.45)           | 0.977        | 0.389         |
| Elbow max velocity (cm/s)         | 87.01 (16.47)             | 73.60 (23.40)           | 70.46 (10.97)           | 3.324        | 0.051         |
| Shoulder max velocity (cm/s)      | 34.89 (13.35)             | 26.07 (11.92)           | 31.45 (16.04)           | 0.891        | 0.422         |
| Hand acceleration time (s)        | 3.14 (0.77)               | 1.78 (1.40)             | 2.10 (1.87)             | 3.318        | 0.051         |
| Elbow acceleration time (s)       | 3.30 (0.78)               | 1.92 (1.34)             | 2.29 (1.87)             | 3.324        | 0.051         |
| Shoulder acceleration time (s)    | 3.46 (0.77)               | 2.13 (1.35)             | 2.39 (1.81)             | <b>3.466</b> | <b>0.045*</b> |
| Hand DSJP <sup>ϕ</sup>            | 33.60 (6.02)              | 39.90 (12.88)           | 36.62 (11.56)           | 0.679        | 0.515         |
| Elbow DSJP                        | 25.50 (6.74)              | 35.64 (17.82)           | 33.86 (25.36)           | 1.226        | 0.309         |
| Shoulder DSJP                     | 23.29 (13.25)             | 36.58 (27.67)           | 25.76 (8.73)            | 1.543        | 0.231         |
| <b><u>Large box condition</u></b> |                           |                         |                         |              |               |
| Reaching duration (s)             | 1.17 (0.21)               | 1.30 (0.31)             | 1.32 (0.19)             | 1.405        | 0.263.        |
| Hand max velocity (cm/s)          | 101.09 (27.69)            | 91.64 (14.41)           | 87.26 (20.41)           | 0.915        | 0.413         |
| Elbow max velocity (cm/s)         | 81.70 (17.30)             | 80.69 (21.29)           | 73.72 (19.21)           | 0.512        | 0.605         |
| Shoulder max velocity (cm/s)      | 35.24 (12.50)             | 28.12 (9.90)            | 29.04 (6.71)            | 1.324        | 0.284         |
| Hand acceleration time (s)        | 3.32 (0.69)               | 2.34 (1.15)             | 2.64 (2.18)             | 1.236        | 0.308         |
| Elbow acceleration time (s)       | 3.47 (0.73)               | 2.11 (1.33)             | 2.79 (2.15)             | 2.148        | 0.137         |
| Shoulder acceleration time (s)    | 3.63 (0.70)               | 2.31 (1.35)             | 2.90 (2.12)             | 2.143        | 0.138         |
| Hand DSJP                         | 34.96 (10.52)             | 37.28 (13.31)           | 38.99 (8.23)            | 0.420        | 0.662         |
| Elbow DSJP                        | 29.12 (13.32)             | 30.59 (15.79)           | 30.10 (10.54)           | 0.031        | 0.970         |
| Shoulder DSJP                     | 24.21 (11.86)             | 28.16 (13.90)           | 24.61 (8.86)            | 0.231        | 0.796         |

\* $p < 0.05$ ; <sup>ϕ</sup> Log<sub>10</sub> transformed variables;

**Table S3.** Correlation coefficients of reaching variables during walking-for-reaching trials with demographic and clinical characteristics for healthy controls and premutation carriers (including FXTAS-, FXTAS+ and inconclusive individuals).

| <b>Small box condition</b>              | <b>Age</b>                 | <b>IQ</b>          | <b>CGG repeats</b> |
|-----------------------------------------|----------------------------|--------------------|--------------------|
| <u>FMR1 premutation carriers (n=19)</u> |                            |                    |                    |
| Hand max velocity (cm/s)                | r= -0.108, p=0.667         | r= -0.052, p=0.833 | r=0.100, p=0.692   |
| Elbow max velocity (cm/s)               | r= -0.228, p=0.347         | r= -0.142, p=0.561 | r= -0.146, p=0.563 |
| Shoulder max velocity (cm/s)            | r= -0.332, p=0.165         | r= -0.222, p=0.360 | r=-0.304, p=0.220  |
| Hand acceleration time (s)              | r=0.253, p=0.295           | r=0.278, p=0.250   | r=0.208, p=0.408   |
| Elbow acceleration time (s)             | r=0.246, p=0.309           | r=0.255, p=0.293   | r=0.237, p=0.344   |
| Shoulder acceleration time (s)          | r=0.326, p=0.173           | r=0.262, p=0.278   | r=0.218, p=0.385   |
| Hand DSJP                               | r=0.183, p=0.453           | r=0.088, p=0.721   | r= -0.037, p=0.884 |
| Elbow DSJP                              | r=0.126, p=0.607           | r=0.200, p=0.413   | r=0.052, p=0.837   |
| Shoulder DSJP                           | r=0.157, p=0.522           | r=0.200, p=0.412   | r=0.194, p=0.440   |
| <u>Controls (n=16)</u>                  |                            |                    |                    |
| Hand max velocity (cm/s)                | r= -0.256, p=0.338         | r= -0.220, p=0.412 | —                  |
| Elbow max velocity (cm/s)               | r=0.023, p=0.931           | r= -0.131, p=0.630 | —                  |
| Shoulder max velocity (cm/s)            | r=0.189, p=0.482           | r=0.242, p=0.367   | —                  |
| Hand acceleration time (s)              | r= -0.023, p=0.932         | r= -0.188, p=0.486 | —                  |
| Elbow acceleration time (s)             | r= -0.012, p=0.964         | r= -0.194, p=0.472 | —                  |
| Shoulder acceleration time (s)          | r= -0.105, p=0.699         | r= -0.261, p=0.329 | —                  |
| Hand DSJP                               | r= -0.124, p=0.648         | r= -0.169, p=0.533 | —                  |
| Elbow DSJP                              | r=0.041, p=0.881           | r= -0.129, p=0.633 | —                  |
| Shoulder DSJP                           | r= -0.035, p=0.899         | r= -0.199, p=0.460 | —                  |
| <b>Large box condition</b>              |                            |                    |                    |
| <u>FMR1 premutation carriers (n=19)</u> |                            |                    |                    |
| Hand max velocity (cm/s)                | r= -0.198, p=0.416         | r= -0.266, p=0.351 | r=0.130, p=0.608   |
| Elbow max velocity (cm/s)               | r= -0.299, p=0.214         | r= -0.329, p=0.170 | r= -0.135, p=0.592 |
| Shoulder max velocity (cm/s)            | <b>r= -0.487, p=0.035*</b> | r= -0.423, p=0.071 | r= -0.198, p=0.430 |
| Hand acceleration time (s)              | r=0.217, p=0.372           | r=0.269, p=0.265   | r=0.071, p=0.779   |
| Elbow acceleration time (s)             | r=0.234, p=0.335           | r=0.301, p=0.210   | r=0.086, p=0.734   |
| Shoulder acceleration time (s)          | r=0.271, p=0.262           | r=0.184, p=0.452   | r=0.108, p=0.669   |
| Hand DSJP                               | r=0.161, p=0.511           | r=0.244, p=0.314   | r=0.161, p=0.524   |
| Elbow DSJP                              | r=0.200, p=0.411           | r=0.298, p=0.215   | r=0.104, p=0.680   |
| Shoulder DSJP                           | r=0.235, p=0.333           | r=0.285, p=0.237   | r=0.046, p=0.857   |

Controls (n=16)

|                                |                    |                    |   |
|--------------------------------|--------------------|--------------------|---|
| Hand max velocity (cm/s)       | r= -0.167, p=0.537 | r= -0.030, p=0.912 | — |
| Elbow max velocity (cm/s)      | r=0.142, p=0.599   | r=0.054, p=0.843   | — |
| Shoulder max velocity (cm/s)   | r=0.228, p=0.396   | r=0.309, p=0.244   | — |
| Hand acceleration time (s)     | r= -0.046, p=0.866 | r= -0.388, p=0.138 | — |
| Elbow acceleration time (s)    | r=0.012, p=0.966   | r= -0.363, p=0.168 | — |
| Shoulder acceleration time (s) | r= -0.093, p=0.731 | r= -0.466, p=0.069 | — |
| Hand DSJP                      | r=0.033, p=0.902   | r= -0.041, p=0.881 | — |
| Elbow DSJP                     | r=0.095, p=0.727   | r=0.026, p=0.924   | — |
| Shoulder DSJP                  | r=0.104, p=0.702   | r= -0.032, p=0.908 | — |

---

\*p<0.05.
